# Supplementary material for: Photosalient effect and reversible photochromic photoluminescence driven by cascade [2 + 2] cycloaddition reaction and water adsorption in a 0D hybrid metal halide
Source: Royal Society of Chemistry journal article supplement (doi:10.1039/d5sc03344f), 2025-01-01
Supplement: d5sc03344f1.pdf [file d5sc03344f1.pdf]

## Supporting Information

### **Photosalient effect and reversible photochromic photoluminescence driven by cascade [2+2] cycloaddition reaction and water adsorption in 0D hybrid metal halide**

Chudong Chen<sup>a,b</sup>, Ziquan Li<sup>b</sup>, Yonghong Xiao<sup>b</sup>, Chenghao Ye<sup>c</sup>, Jianwu Wei<sup>a</sup>,

Ruosheng Zeng<sup>d</sup>, Qi Pang<sup>a</sup> and Binbin Luo<sup>a,\*</sup>

*<sup>a</sup> School of Chemistry and Chemical Engineering and Key Laboratory of Electrochemical Energy Materials, Guangxi University, Nanning 530004, P. R. China*

*<sup>b</sup> College of Chemistry and Chemical Engineering, Shantou University, Shantou, 515063, P. R. China*

*<sup>c</sup> School of Power and Mechanical Engineering, Wuhan University, Wuhan 430072, P. R. China*

*<sup>d</sup> School of Physical Science and Technology/State Key Laboratory of Featured Metal Materials and Life-cycle Safety for Composite Structures, Guangxi University, Nanning 530004, P. R. China*

**Corresponding Author:** bbluo@gxu.edu.cn

## Table of Contents

|                           |     |
|---------------------------|-----|
| Table of Contents.....    | S1  |
| Experimental Section..... | S2  |
| Table S1.....             | S5  |
| Figure S1.....            | S6  |
| Figure S2.....            | S6  |
| Figure S3.....            | S6  |
| Figure S4.....            | S7  |
| Figure S5.....            | S7  |
| Figure S6.....            | S8  |
| Figure S7.....            | S9  |
| Figure S8.....            | S9  |
| Figure S9.....            | S10 |
| Figure S10.....           | S11 |
| Figure S11.....           | S12 |
| Figure S12.....           | S13 |
| Figure S13.....           | S13 |
| Table S2.....             | S14 |
| Figure S14.....           | S15 |
| Figure S15.....           | S15 |
| Figure S16.....           | S16 |
| Figure S17.....           | S16 |
| Figure S18.....           | S17 |
| Figure S19.....           | S17 |
| Figure S20.....           | S18 |
| Figure S21.....           | S18 |
| REFERENCES.....           | S19 |

## EXPERIMENTAL SECTION

### Materials and methods

4-Styrylpyridine (**L**, 98%, Adamas), indium chloride (99.99%, Aladdin), hydrochloride acid (37%, Guanghua Sci-Tech), ethyl acetate (EA, 99.7%, Guanghua Sci-Tech), ethanol (99.7%, Guanghua Sci-Tech), polymethyl methacrylate (PMMA, 98%, Wangda Plastic), dimethyl sulfoxide- $d_6$  (DMSO- $d_6$ , 99.8%, J&K), paraffin oil (100%, Hampton Research). All chemicals were used without further purification.

### Synthesis of **LH·Cl** and **LH·Cl-450**

0.0181 g of **L** were dissolved in 500  $\mu$ L concentrated HCl at 120 °C in the sealed pressure bottle, the solution was cooled to room temperature without perturbation, and **LH·Cl** was obtained overnight with a yield of 77.7%.  $^1\text{H}$  NMR (400 MHz, DMSO- $d_6$ ):  $\delta$  8.85 (d,  $J$  = 6.1 Hz, 2H), 8.22 (d,  $J$  = 6.2 Hz, 2H), 8.02 (d,  $J$  = 16.4 Hz, 1H), 7.82 – 7.71 (m, 2H), 7.56 (d,  $J$  = 16.4 Hz, 1H), 7.53 – 7.38 (m, 3H). **LH·Cl-450** was obtained through irradiating **LH·Cl** with 450 nm light for 0.5 h.  $^1\text{H}$  NMR (400 MHz, DMSO- $d_6$ ):  $\delta$  8.74 (d,  $J$  = 6.3 Hz, 4H), 7.94 (d,  $J$  = 6.2 Hz, 4H), 7.28 (d,  $J$  = 7.2 Hz, 4H), 7.21 (t,  $J$  = 7.5 Hz, 4H), 7.11 (t,  $J$  = 7.3 Hz, 2H), 5.08 – 4.90 (m, 4H).

### Synthesis of **(LH)<sub>2</sub>InCl<sub>5</sub>** single crystals

**(LH)<sub>2</sub>InCl<sub>5</sub>** (**1**) single crystals were synthesized by loading 0.10 mmol **L**, 0.05 mmol indium chloride into a 15.0 mL pressure bottle containing 1.00 mL concentrated HCl. After all reactants were dissolved at 120 °C (the temperature of hot plate) in the sealed pressure bottle, the solution was cooled to room temperature without perturbation, and the yellow block crystals of **1** with a yield of 38.1% were obtained overnight.  $^1\text{H}$  NMR (600 MHz, DMSO- $d_6$ , ppm):  $\delta$  8.84 (d,  $J$  = 6.8 Hz, 2H), 8.20 (d,  $J$  = 6.1 Hz, 2H), 8.00 (d,  $J$  = 16.4 Hz, 1H), 7.76 (d,  $J$  = 8.8 Hz, 2H), 7.55 (dd,  $J$  = 16.4, 1.8 Hz, 1H), 7.48 (ddd,  $J$  = 7.8, 6.4, 1.6 Hz, 2H), 7.44 (td,  $J$  = 7.1, 1.7 Hz, 1H).

### Synthesis of **(L<sub>2</sub>H<sub>2</sub>)<sub>2</sub>[In(H<sub>2</sub>O)Cl<sub>5</sub>][InCl<sub>5</sub>]** single crystals

**1** single crystals, wrapped in PN oil, were placed on microscope slides and exposed to 450 nm light at 223 K for about 30 minutes, then **(L<sub>2</sub>H<sub>2</sub>)<sub>2</sub>[In(H<sub>2</sub>O)Cl<sub>5</sub>][InCl<sub>5</sub>]** (**1i**) single crystals were obtained. The distance between the light source and the sample was about 10 cm.

### Synthesis of (L<sub>2</sub>H<sub>2</sub>)[In(H<sub>2</sub>O)Cl<sub>5</sub>] single crystals

(L<sub>2</sub>H<sub>2</sub>)[In(H<sub>2</sub>O)Cl<sub>5</sub>] (**1a**) single crystals were obtained through irradiating **1** single crystals on microscope slides with 450 nm light at 223 K for ~30 minutes. The distance between the light source and the samples was about 10 cm. <sup>1</sup>H NMR (600 MHz, DMSO-*d*<sub>6</sub>, ppm): δ 8.71 (d, *J* = 5.1 Hz, 4H), 7.91 (d, *J* = 6.1 Hz, 4H), 7.28 (d, *J* = 8.2 Hz, 4H), 7.21 (td, *J* = 7.7, 1.5 Hz, 4H), 7.11 (td, *J* = 7.3, 1.4 Hz, 2H), 4.98 (ddd, *J* = 60.6, 10.8, 7.8 Hz, 4H).

### Synthesis of 1-PMMA film

First, 1.0 g of PMMA was dissolved in EA with a volume of 30.0 mL. Subsequently, 0.20 g of finely ground **1** powder was added, followed by ultrasonic treatment for 15 minutes. Then, 7.0 mL of the thus-prepared mixed solution was transferred into a polytetrafluoroethylene culture dish. After being left to stand for 4 hours at room temperature, the **1**-PMMA film was obtained via the evaporation of EA solvent.

### Characterization

**Single crystal X-ray diffraction (SC-XRD).** SC-XRD tests were conducted on Rigaku XtaLab Pro MM007HF DWX diffractometer at 293 K for **1** and 200 K for **1i** and **1a** using Cu Kα radiation ( $\lambda$  = 1.5418 Å). The structures were solved by intrinsic phasing method using SHELXT<sup>[1]</sup> program implanted in Olex2.<sup>[2]</sup> Refinement with full matrix least squares techniques on *F*<sup>2</sup> was performed by using SHELXL.<sup>[3]</sup> Non-hydrogen atoms were anisotropically refined and all hydrogen atoms were generated based on riding mode.

**Powder XRD.** PXRD patterns were recorded on MiniFlex 600 (Rigaku) to examine the crystalline phase.

**UV-vis diffuse reflectance spectroscopy.** UV-vis spectra were measured on Lambda 950 UV-vis Spectrometer (PerkinElmer).

**Photoluminescence (PL) spectrum.** PL spectra were collected on PTI QM-TM (Photon Technology International).

**<sup>1</sup>H nuclear magnetic resonance (<sup>1</sup>H-NMR) spectra.** <sup>1</sup>H-NMR spectra were recorded with a Bruker Advance 600 MHz spectrometer using DMSO-*d*<sub>6</sub> as solvents.

**Fourier transform infrared (FTIR) spectra.** FTIR spectra were measured on Thermo Fisher

Scientific (Nicolet AVATAR 360).

**Thermogravimetry analysis (TGA).** TGA curve was recorded on TA TGA550 with a heating rate of 5 °C/min.

**Scanning electron microscope (SEM) and Energy dispersive spectroscopy (EDS) mapping.** SEM images and EDS mapping (JSM-7500F, JEOL) were carried out to obtain the morphology and elemental distribution.

**Transmission Electron Microscopy (TEM) and EDS mapping.** TEM images and EDS mapping (JEM-F200, JEOL) were carried out to obtain the morphology and elemental distribution.

**Hirshfeld surface analysis.** The Hirshfeld surface was calculated by using the Crystal Explorer software based on the crystal structures.<sup>[4]</sup>

**Free volume calculation.** Free volume was calculated by using the Mercury software based on the crystal structures, the probe radius and approx. grid spacing are set as 1.0 Å and 0.2 Å.

**Computational Details.** All density functional theory (DFT) calculations were performed using the ORCA 6.0.1 software package.<sup>[5-7]</sup> Geometries were optimized using the M06 functional<sup>[8]</sup> with a basis set of def2-SVP for all atoms. Vibrational frequencies were calculated for all the stationary points to confirm if each optimized structure is a local minimum on the respective potential energy surface or a transition state structure with only one imaginary frequency. The intrinsic reaction coordinate (IRC) calculations were carried out to confirm the located transition states connect the correct intermediates. The single-point energy was calculated at M06/def2-TZVP level.

We show constrained geometries optimization with C–C bond-forming distances fixed at 1.5 to 3.0 Å. These values are typical for the process of forming and breaking C–C distances in many pericyclic reactions. Constraint DFT optimization of the transition state based on the C–C bond-forming distances fixed at 2.0 Å gives the constrained transition states. The constrained transition states are not true first-order saddle points on the potential energy surface, but these transition states offer similar geometries for the cycloaddition transition states involving different dienes and allow us to solely focus on the coordinated effect toward the interaction energies and its components, without the complications of early and later or asynchronous transition states. The optimized reactants, products and transition state structures were plotted using CYLview.<sup>[9]</sup>

**Table S1.** Crystal data of **1**, **1i** and **1a**.

| Sample                                                                       | <b>1</b>                                                           | <b>1i</b>                                                                                                                 | <b>1a</b>                                                                               |
|------------------------------------------------------------------------------|--------------------------------------------------------------------|---------------------------------------------------------------------------------------------------------------------------|-----------------------------------------------------------------------------------------|
| Empirical formula                                                            | (C <sub>13</sub> H <sub>12</sub> N) <sub>2</sub> InCl <sub>5</sub> | (C <sub>26</sub> H <sub>24</sub> N <sub>2</sub> ) <sub>2</sub> [In(H <sub>2</sub> O)Cl <sub>5</sub> ][InCl <sub>5</sub> ] | (C <sub>13</sub> H <sub>12</sub> N) <sub>2</sub> [In(H <sub>2</sub> O)Cl <sub>5</sub> ] |
| Formula weight                                                               | 656.54                                                             | 1331.10                                                                                                                   | 674.56                                                                                  |
| Temperature/K                                                                | 293(4)                                                             | 200.00(10)                                                                                                                | 199.99(10)                                                                              |
| Radiation                                                                    | Cu K $\alpha$<br>( $\lambda$ = 1.54184 Å)                          | Cu K $\alpha$<br>( $\lambda$ = 1.54184 Å)                                                                                 | Cu K $\alpha$<br>( $\lambda$ = 1.54184 Å)                                               |
| Crystal system                                                               | triclinic                                                          | triclinic                                                                                                                 | triclinic                                                                               |
| Space group                                                                  | <i>P</i> $\bar{1}$                                                 | <i>P</i> $\bar{1}$                                                                                                        | <i>P</i> $\bar{1}$                                                                      |
| <i>a</i> /Å                                                                  | 8.5802(5)                                                          | 10.8121(3)                                                                                                                | 10.8192(4)                                                                              |
| <i>b</i> /Å                                                                  | 9.2837(3)                                                          | 15.0764(5)                                                                                                                | 11.7903(5)                                                                              |
| <i>c</i> /Å                                                                  | 18.2358(3)                                                         | 18.0060(4)                                                                                                                | 11.9138(5)                                                                              |
| $\alpha$ /°                                                                  | 97.408(2)                                                          | 90.349(2))                                                                                                                | 99.720(4)                                                                               |
| $\beta$ /°                                                                   | 98.221(3)                                                          | 91.409(2)                                                                                                                 | 92.935(3)                                                                               |
| $\gamma$ /°                                                                  | 105.005(4)                                                         | 95.489(2)                                                                                                                 | 98.493(3)                                                                               |
| <i>V</i> /Å <sup>3</sup>                                                     | 1367.56(10)                                                        | 2920.67(14)                                                                                                               | 1476.97(11)                                                                             |
| <i>Z</i>                                                                     | 2                                                                  | 2                                                                                                                         | 2                                                                                       |
| $\rho_{calc}$ (g/cm <sup>3</sup> )                                           | 1.594                                                              | 1.514                                                                                                                     | 1.517                                                                                   |
| completeness to<br>$\theta_{max}$                                            | 94.7%                                                              | 95.0%                                                                                                                     | 96.0%                                                                                   |
| GOF                                                                          | 1.083                                                              | 1.059                                                                                                                     | 1.048                                                                                   |
| <i>R</i> <sub>int</sub>                                                      | 0.0293                                                             | 0.0786                                                                                                                    | 0.0260                                                                                  |
| final <i>R</i> indexes<br>[ <i>I</i> > 2 $\sigma$ ( <i>I</i> )] <sup>a</sup> | <i>R</i> <sub>1</sub> = 0.0325,<br><i>wR</i> <sub>2</sub> = 0.0864 | <i>R</i> <sub>1</sub> = 0.0641,<br><i>wR</i> <sub>2</sub> = 0.1612                                                        | <i>R</i> <sub>1</sub> = 0.0754,<br><i>wR</i> <sub>2</sub> = 0.2226                      |
| <i>R</i> indexes (all<br>data) <sup>a</sup>                                  | <i>R</i> <sub>1</sub> = 0.0367,<br><i>wR</i> <sub>2</sub> = 0.0884 | <i>R</i> <sub>1</sub> = 0.1020,<br><i>wR</i> <sub>2</sub> = 0.1738                                                        | <i>R</i> <sub>1</sub> = 0.0844,<br><i>wR</i> <sub>2</sub> = 0.2337                      |
| largest diff. peak<br>and hole, e Å <sup>-3</sup>                            | 0.54/-0.60                                                         | 1.08/-1.42                                                                                                                | 1.76/-1.46                                                                              |

<sup>a</sup>  $R_I = \Sigma||F_o| - |F_c|| / \Sigma|F_o|$ ;  $wR_2 = \{[\Sigma w(F_o^2 - F_c^2)^2] / \Sigma[w(F_o^2)^2]\}^{1/2}$ ;  $w = 1/[\sigma^2(F_o^2) + (aP)^2 + bP]$ , where  $P = [\max(F_o^2, 0) + 2Fc^2]/3$  for all data.

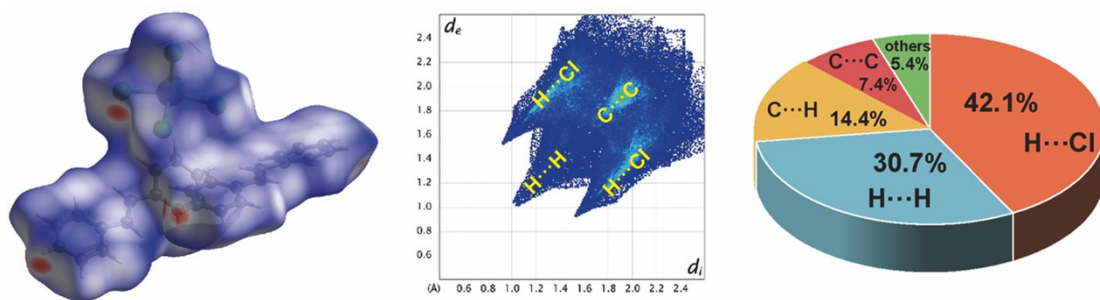

**Figure S1.** Hirshfeld surface view, 2D fingerprint plots, and the relative contributions of atomic contacts to the Hirshfeld surface of **1**.

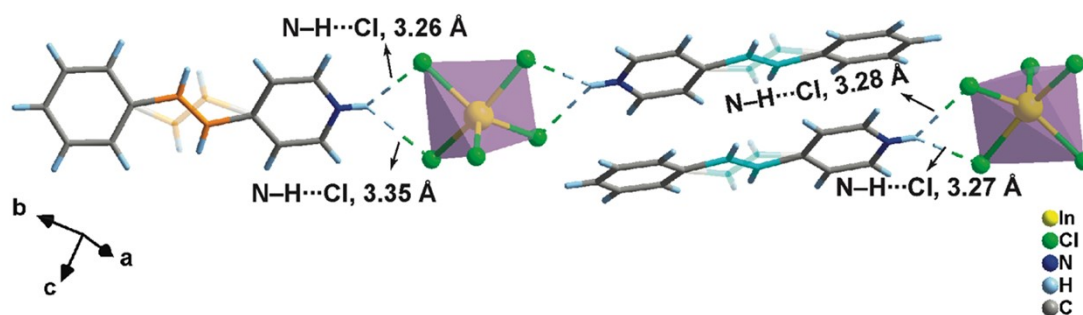

**Figure S2.** Hydrogen bonding interaction between  $\text{LH}^+$  dimer and  $[\text{InCl}_5]^{2-}$  polyhedron in **1**.

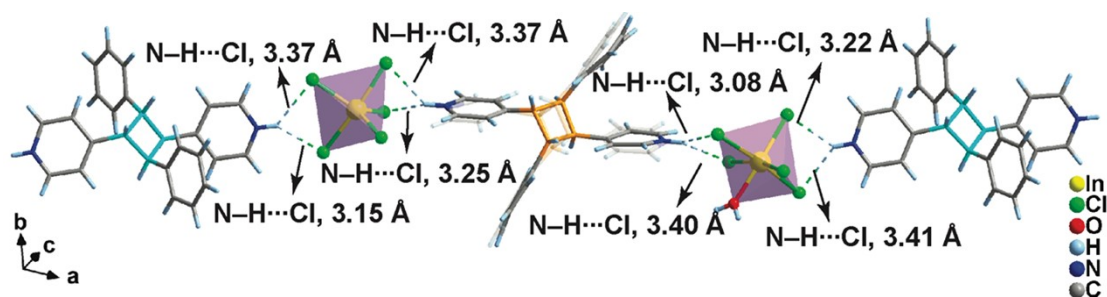

**Figure S3.** Hydrogen bonding interaction between  $\text{LH}^+$  photodimers and  $[\text{InCl}_5\cdot\text{H}_2\text{O}]^{2-}/[\text{InCl}_5]^{2-}$  polyhedron in **1i**.

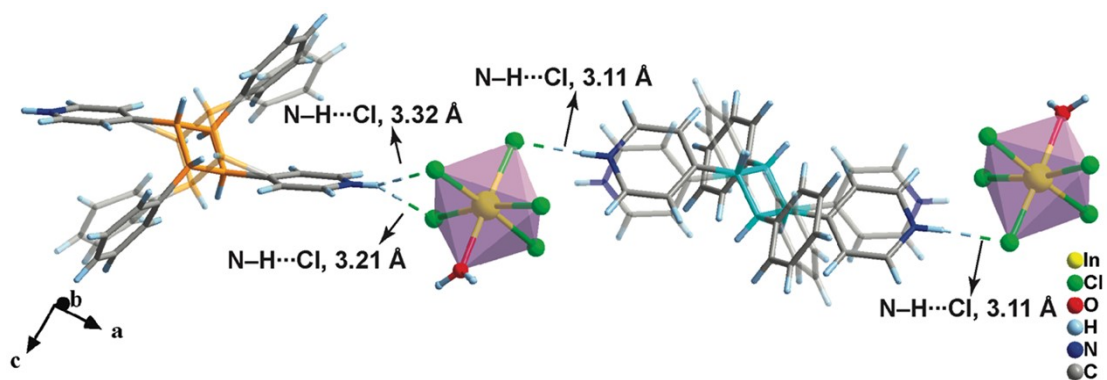

**Figure S4.** Hydrogen bonding interaction between  $\text{LH}^+$  photodimers and  $[\text{InCl}_5 \cdot \text{H}_2\text{O}]^{2-}$  octahedron in **1a**.

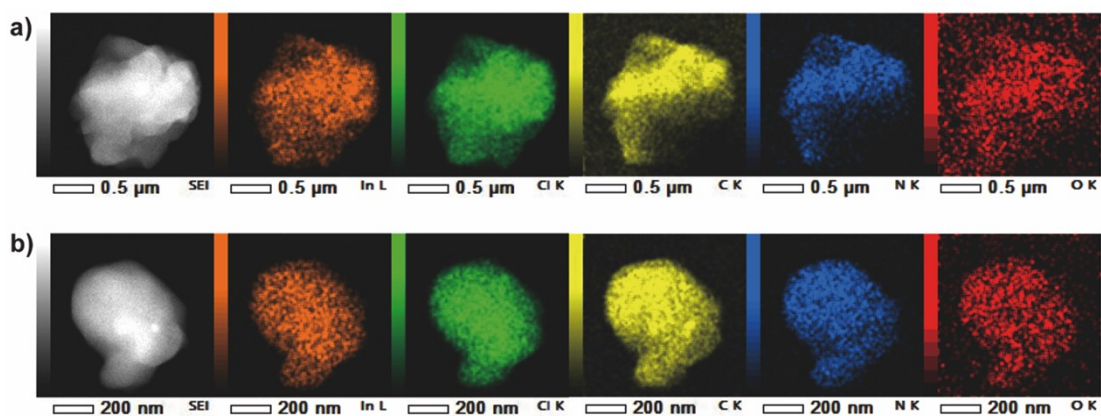

**Figure S5.** EDS mapping of In, Cl, C, N and O elements for (a) **1** and (b) **1a**.



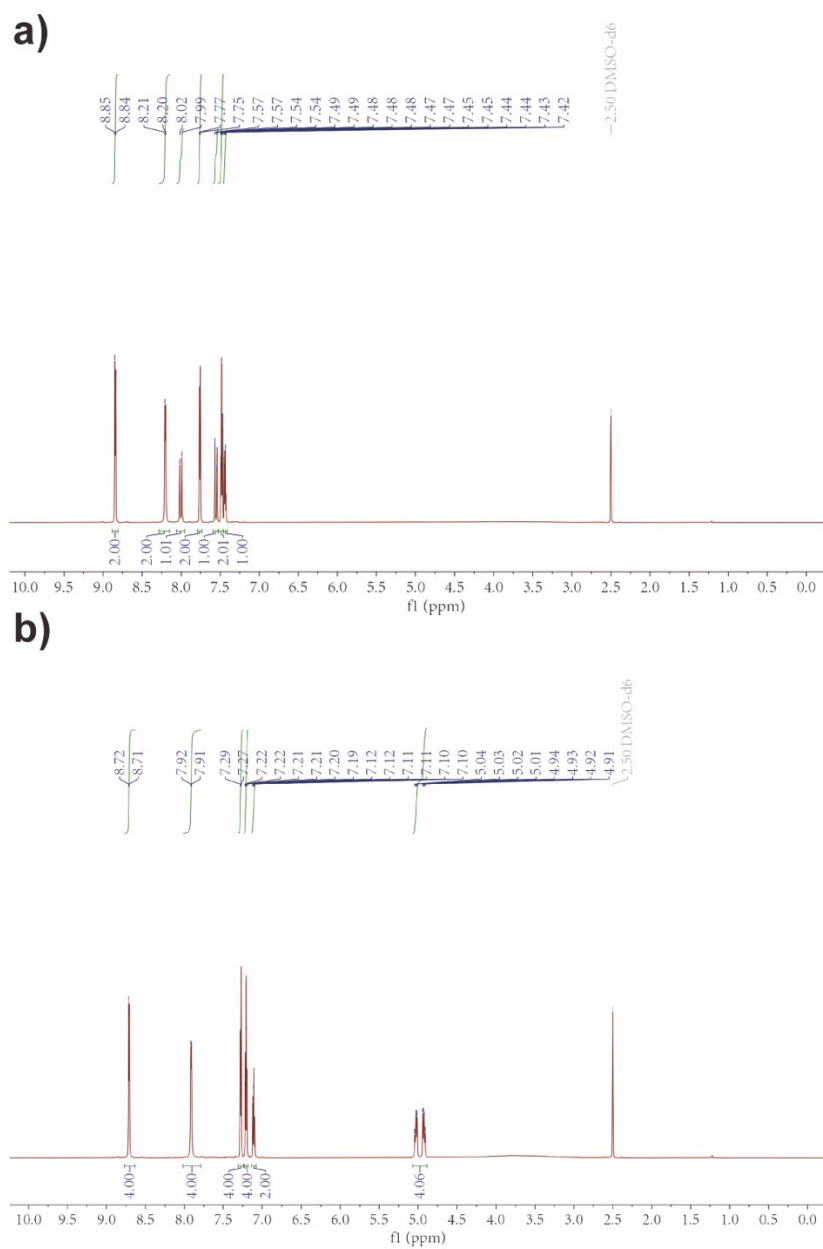

**Figure S6.**  $^1\text{H}$  NMR spectrum of (a) **1** and (b) **1a** in  $\text{DMSO-}d_6$ .

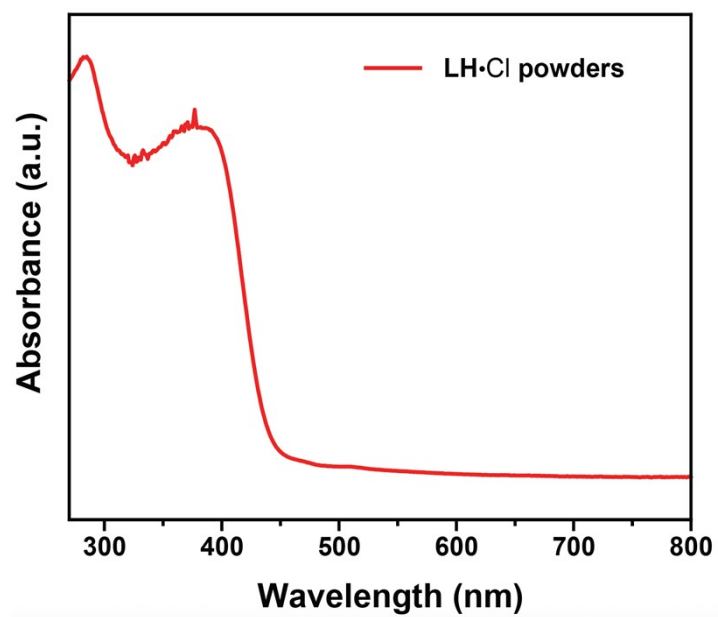

**Figure S7.** UV-vis diffuse reflectance spectrum of LH·Cl

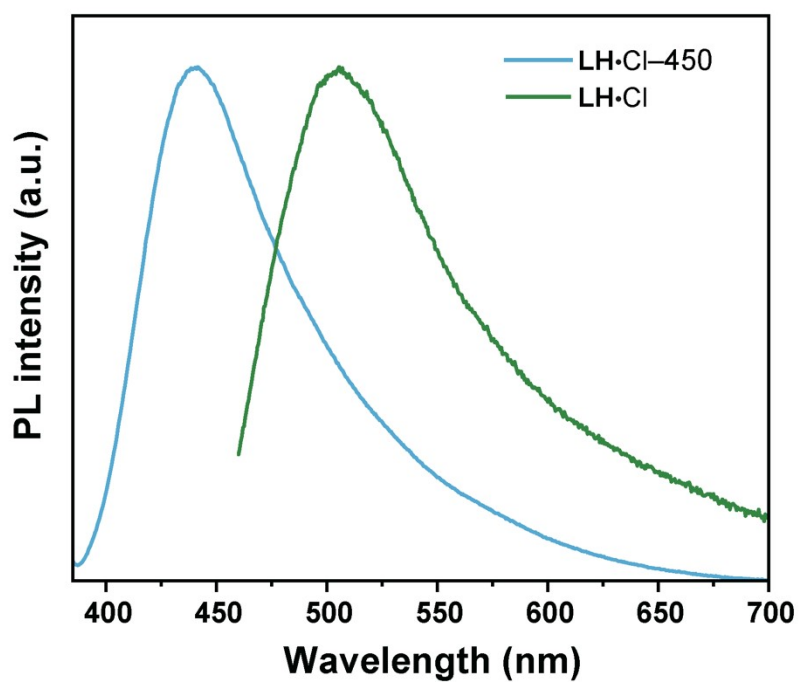

**Figure S8.** PL spectra of LH·Cl and LH·Cl-450 (LH·Cl powder irradiated at 450 nm for 10 minutes).

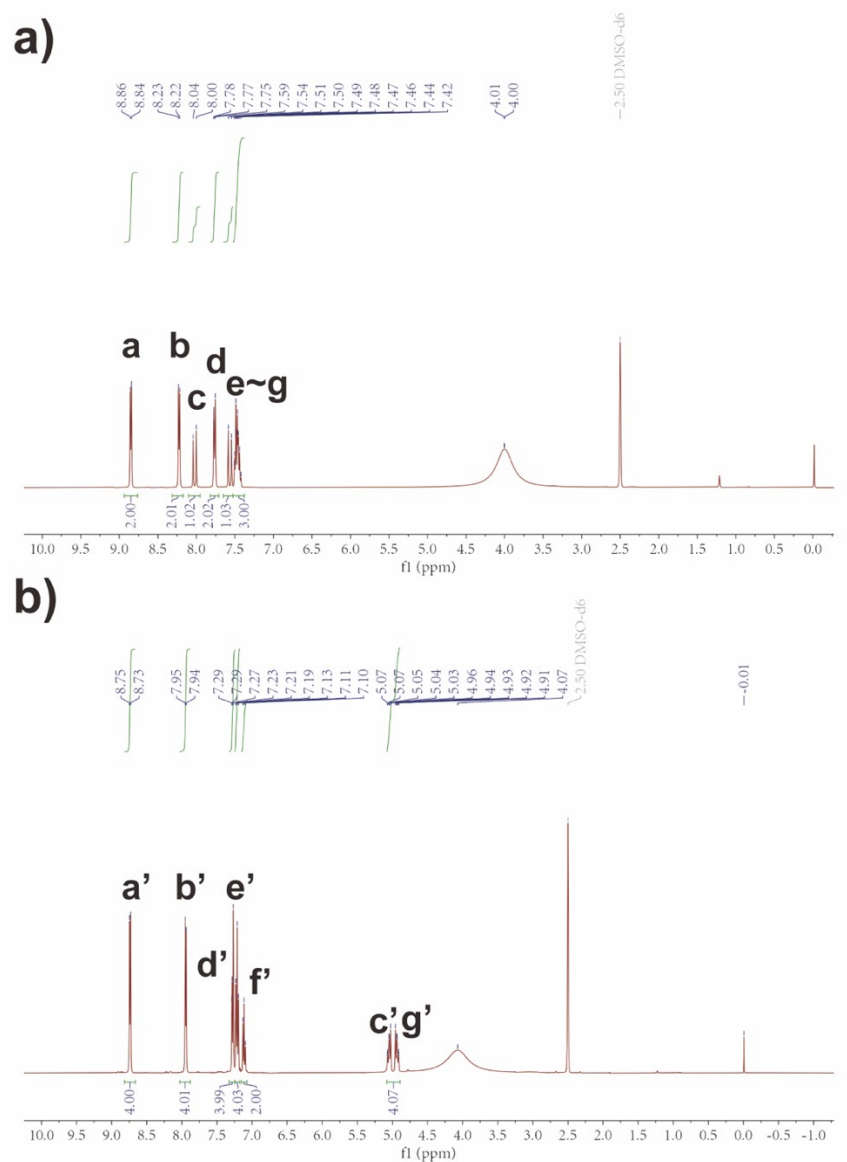

**Figure S9.**  $^1\text{H}$  NMR spectrum of (a)  $\text{LH}\cdot\text{Cl}$  and (b)  $\text{LH}\cdot\text{Cl-450}$  in  $\text{DMSO-}d_6$ .

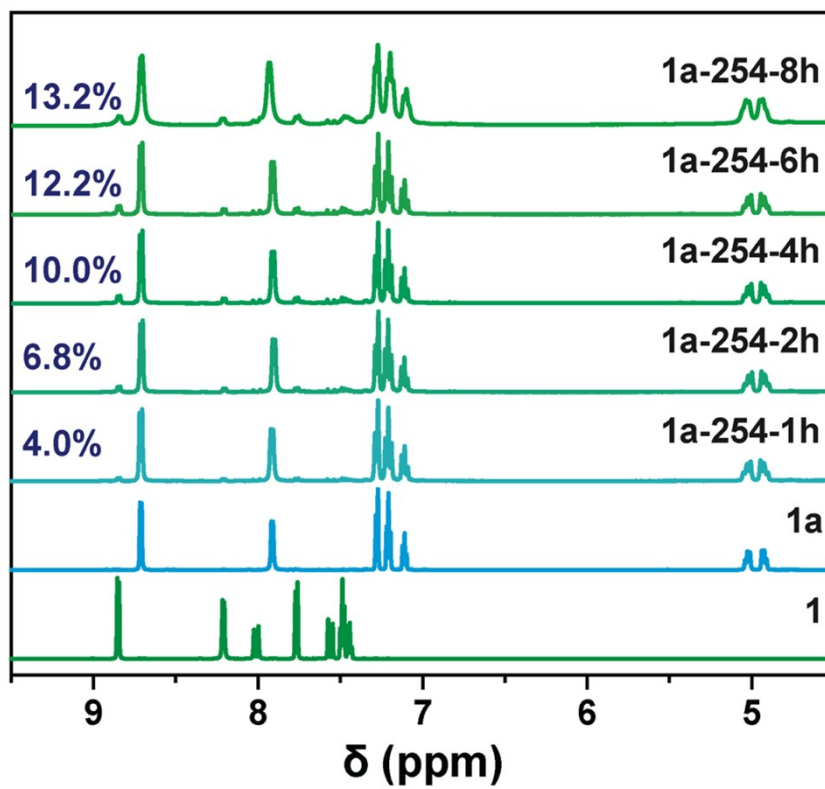

**Figure S10.** <sup>1</sup>H NMR spectra (solvent: DMSO-*d*<sub>6</sub>) of **1a-254** with different irradiation time.

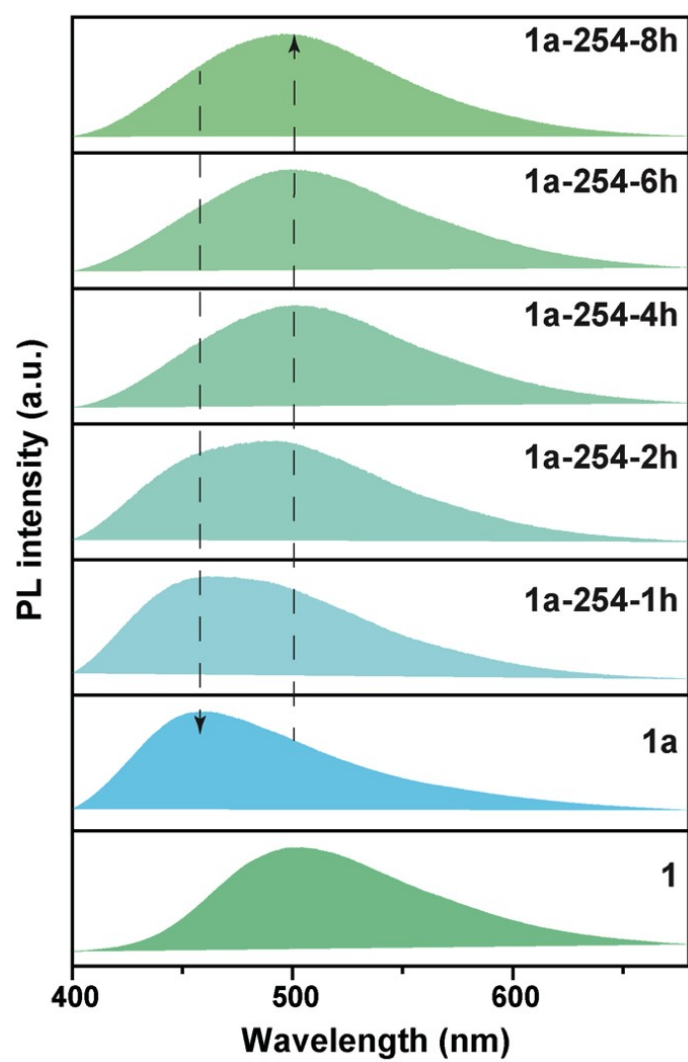

Figure S11. PL spectra of **1a-254** with different irradiation time.

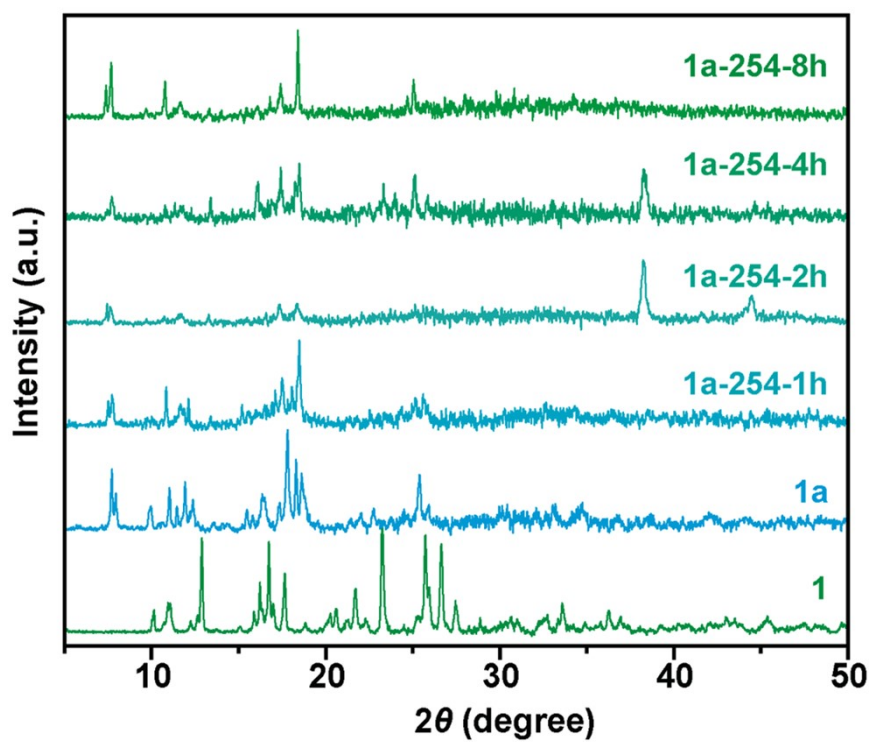

**Figure S12.** PXRD of **1a-254** with different irradiation time.

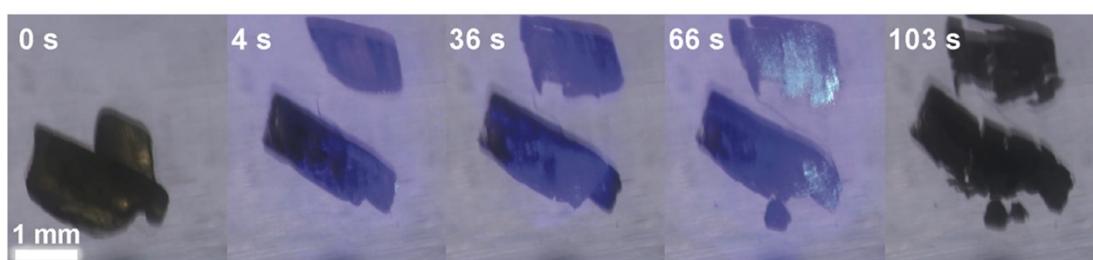

**Figure S13.** Images of **1** in Schlenk tube evacuated for 2 hours at 80 °C under the irradiation of 450 nm light (130 mW/cm<sup>2</sup>).

**Table S2.** Photomechanical performance of some reported compounds.

| Samples                                                        | Structural Type | Volume change | Light source                         | Photomechanical response                | Reference |
|----------------------------------------------------------------|-----------------|---------------|--------------------------------------|-----------------------------------------|-----------|
| [Zn(bdc)(3-F-spy)]                                             | CPs             | −6.10%        | 365 nm                               | bending, splitting<br>twisting          | 10        |
| [Cu <sub>2</sub> (benzoate) <sub>4</sub> (4spy) <sub>2</sub> ] | CPs             | +15.40%       | 365 nm                               | popping                                 | 11        |
| [Zn <sub>2</sub> (cin) <sub>4</sub> (4spy) <sub>2</sub> ]      | CPs             | +11.93%       | 351 nm<br>(150 W)                    | spurting                                | 12        |
| [Zn(NCS) <sub>2</sub> (2F-4spy) <sub>2</sub> ]                 | CPs             | +17.60%       | UV light                             | popping                                 | 13        |
| [Ag(2F-4spy) <sub>2</sub> ]BF <sub>4</sub>                     | CPs             | +18.97%       | UV light<br>(28 W cm <sup>−2</sup> ) | jumping, splitting                      | 14        |
| ( <b>LH</b> ) <sub>2</sub> InCl <sub>5</sub>                   | ICs             | +8.0%         | 450 nm<br>(130 mW cm <sup>−2</sup> ) | explosion, bending<br>breaking, jumping | This work |

CPs: coordination polymers; MCs: molecular crystals; ICs: ionic crystals.

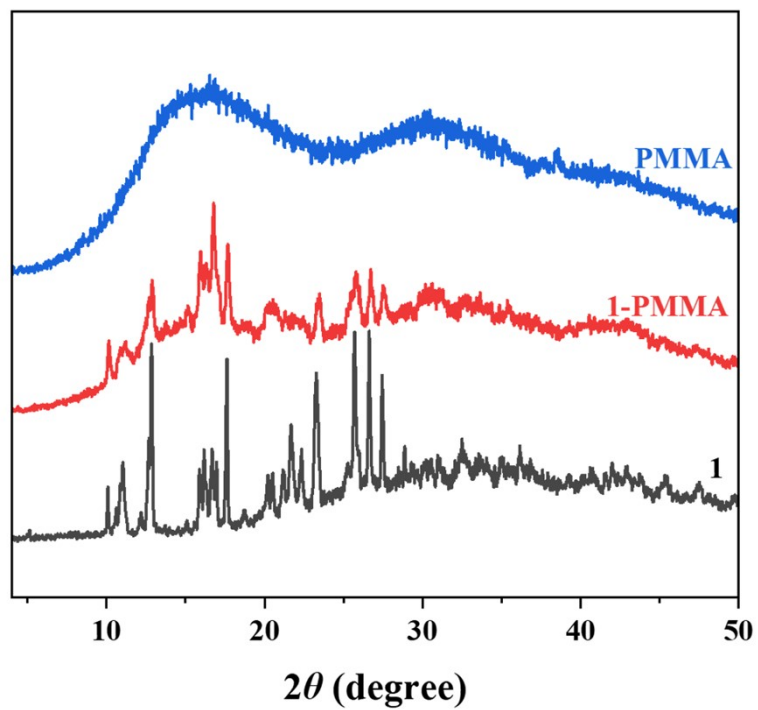

**Figure S14.** PXRD patterns of **1**, 1-PMMA and PMMA.

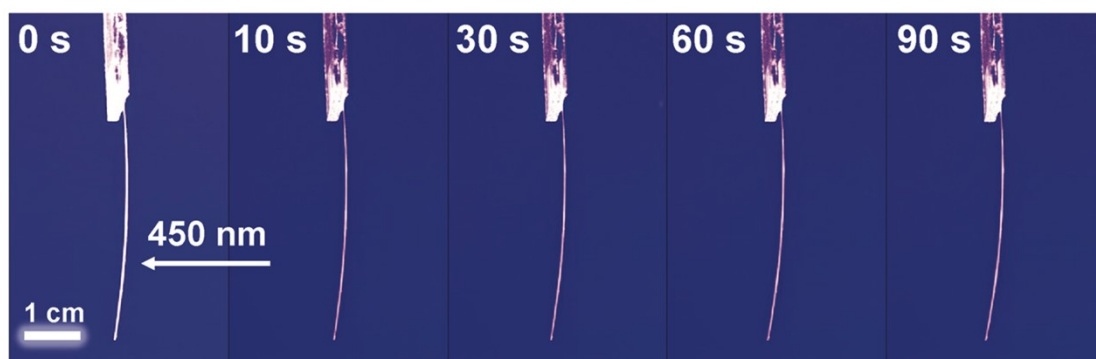

**Figure S15.** Images of PMMA film (0.5 cm × 4 cm) upon exposure to 450 nm light.



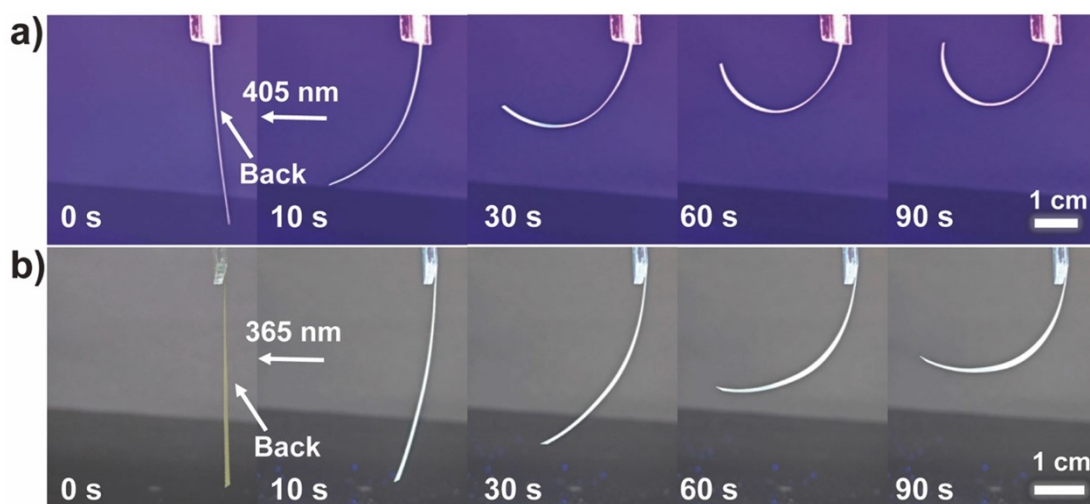

**Figure S16.** Images of 1-PMMA film (0.5 cm × 4 cm) upon exposure to (a) 405 and (b) 365 nm light.

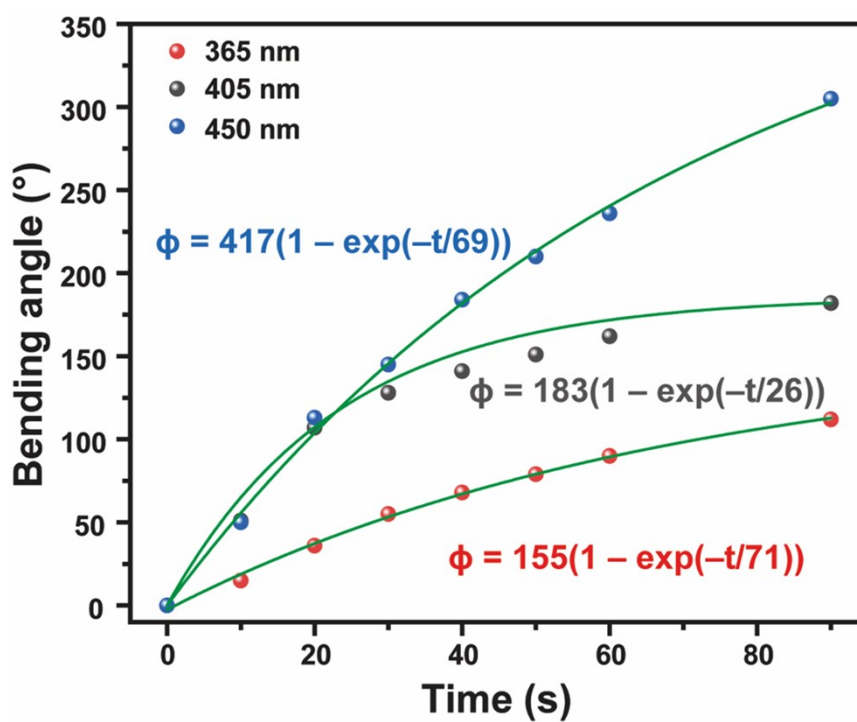

**Figure S17.** Fitting results of the bending angle as a function of exposure time for 1-PMMA with different irradiation wavelengths.

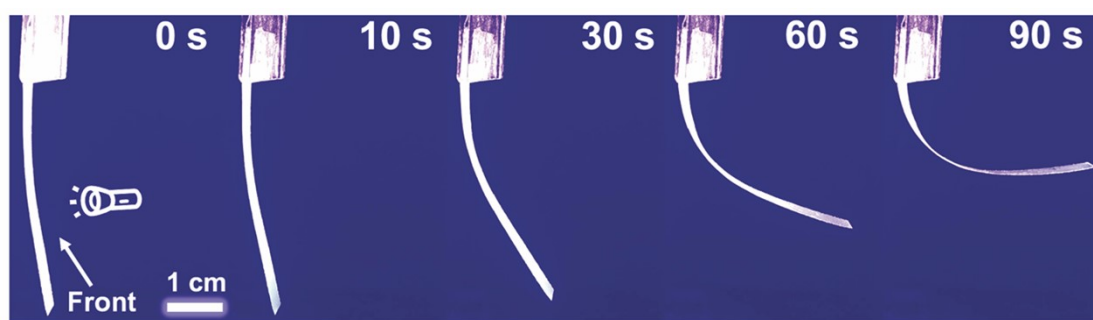

**Figure S18.** Images of the front side of **1-PMMA** (0.5 cm  $\times$  4 cm) upon exposure to 450 nm light.

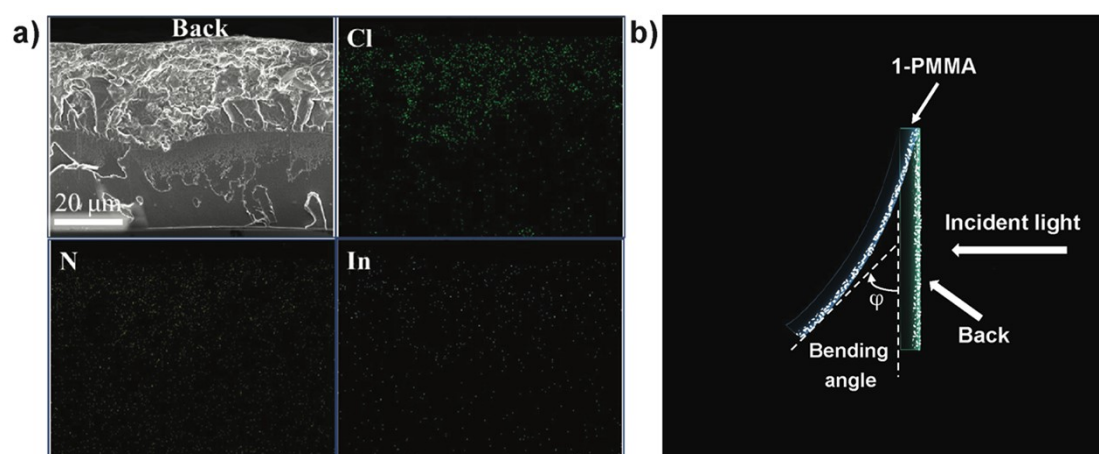

**Figure S19.** (a) SEM image and EDS mapping of In, Cl, N elements for the cross-section of **1-PMMA**. (b) Schematic illustration of the photoinduced bending for **1-PMMA**.

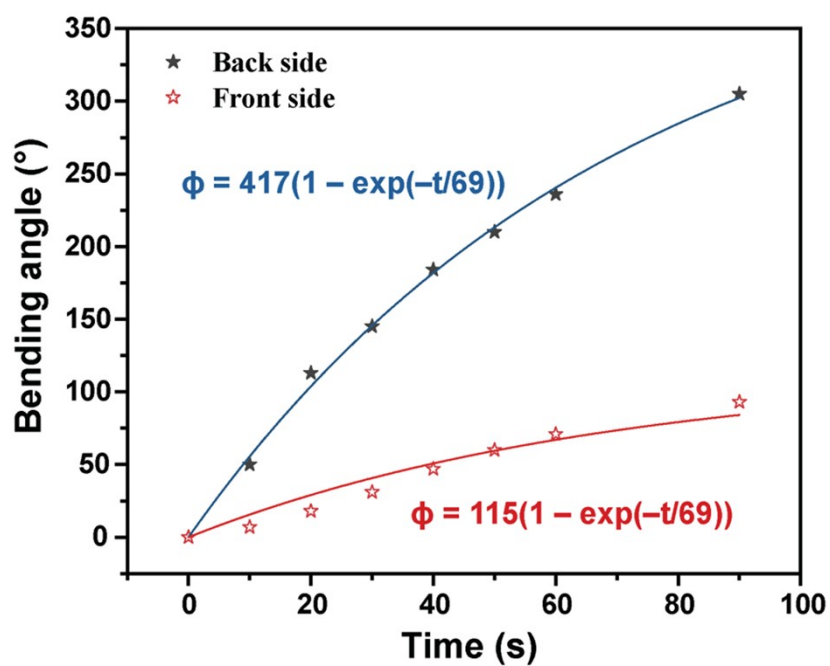

**Figure S20.** Fitting results of 1-PMMA bending angles against exposure time.

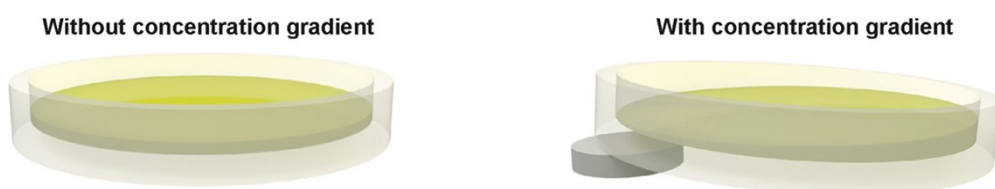

**Figure S21.** Preparation of 1-PMMA without (left) and with (right) concentration gradient.

## REFERENCES

- [1] Sheldrick, G. M., Shelxt-Integrated Space-Group and Crystal-Structure Determination. *Acta Cryst. A* **2015**, 71, 3-8.
- [2] Dolomanov, O. V. B., L. J.; Gildea, R. J.; Howard, J. A. K.; Puschmann, H., Olex2: A Complete Structure Solution, Refinement and Analysis Program. *J. Appl. Crystallogr.* **2009**, 42, 339-341.
- [3] Sheldrick, G. M., A Short History of Shelx. *Acta Cryst. A* **2008**, 64, 112-122.
- [4] M. Turner, J. McKinnon, S. Wolff, D. Grimwood, P. Spackman, D. Jayatilaka, M. Spackman, *CrystalExplorer17*, The University of Western Australia, Australia, **2017**.
- [5] Neese, F., An Improvement of the Resolution of the Identity Approximation for the Formation of the Coulomb Matrix. *J. Comput. Chem.* 2003, 24 (14), 1740-1747.
- [6] Neese, F., Software update: The ORCA Program System—Version 5.0. *Wires: Comput. Mol. Sci.* 2022, 12 (5), e1606.
- [7] Neese, F., The SHARK Integral Generation and Digestion System. *J. Comput. Chem.* 2023, 44 (3), 381-396.
- [8] Zhao, Y., Truhlar, D. G., The M06 Suite of Density Functionals for Main Group Thermochemistry, Thermochemical Kinetics, Noncovalent interactions, Excited states, and Transition Elements: Two New Functionals and Systematic Testing of Four M06-class Functionals and 12 Other Functionals. *Theor. Chem. Acc.* 2008, 120 (1), 215-241.
- [9] CYLview, 1.0b, Legault, C. Y., Université de Sherbrooke, 2009 (<http://www.cylview.org>).
- [10] Y. X. Shi, W. H. Zhang, B. F. Abrahams, P. Braunstein and J. P. Lang, Fabrication of Photoactuators: Macroscopic Photomechanical Responses of Metal-Organic Frameworks to Irradiation by UV Light, *Angew. Chem. Int. Ed.*, **2019**, 58, 9453-9458.
- [11] K. Yadava, G. Gallo, S. Bette, C. E. Mulijanto, D. P. Karothu, I. H. Park, R. Medishetty, P. Naumov, R. E. Dinnebier and J. J. Vittal, Extraordinary anisotropic thermal expansion in photosalient crystals, *IUCrJ*, **2020**, 7, 83-89.
- [12] K. Yadava and J. J. Vittal, Photosalient Behavior of Photoreactive Zn(II) Complexes, *Cryst. Growth Des.*, **2019**, 19, 2542-2547.
- [13] C. E. Mulijanto, H. S. Quah, G. K. Tan, B. Donnadieu and J. J. Vittal, Curved crystal morphology, photoreactivity and photosalient behaviour of mononuclear Zn(II) complexes, *IUCrJ*,

**2017**, 4, 65-71.

[14] R. Medishetty, S. C. Sahoo, C. E. Mulijanto, P. Naumov and J. J. Vittal, Photosalient Behavior of Photoreactive Crystals, *Chem. Mater.*, **2015**, 27, 1821-1829.
